# Supplementary material for: Peripheral blood DNA methylation differences in twin pairs discordant for Alzheimer’s disease
Source: Clin Epigenetics. 2019 Sep 2;11:130. doi: 10.1186/s13148-019-0729-7 (PMC6721173; doi:10.1186/s13148-019-0729-7)
Supplement: Supplementary file 1 — Table of APOE genotypes of the study individuals. (XLSX 10 kb) [file 13148_2019_729_MOESM1_ESM.xlsx]

## Sheet: Sheet1
Additional file 1. Table of APOE genotypes of the study individuals (number of individuals)
	ADD twin pairs								Incident Swedish ADD twins pairs						Unrelated Finnish controls				Unrelated Finnish cases
APOE 𝜀	Males	Females	Finnish	Swedish	Monozygotic	Dizygotic	Total		Males	Females	Monozygotic	Dizygotic	Total		Males	Females	Total		Males	Females	Total
13	0	2	0	2	0	2	2		2	6	0	8	8		0	0	0		0	1	1
22	0	0	0	0	0	0	0		2	0	2	0	2		0	0	0		0	0	0
23	3	4	4	3	2	5	7		9	11	10	10	20		0	1	1		0	0	0
24	1	0	0	1	0	1	1		0	0	0	0	0		0	0	0		0	0	0
33	44	32	50	26	44	32	76		50	64	32	82	114		1	7	8		2	0	2
34	16	13	9	20	10	19	29		24	59	26	57	83		0	0	0		4	5	9
44	4	5	3	6	6	3	9		9	4	6	7	13		0	0	0		3	3	6
ADD Alzheimer's disease discordant
