# Supplementary material for: Peripheral blood DNA methylation differences in twin pairs discordant for Alzheimer’s disease
Source: Clin Epigenetics. 2019 Sep 2;11:130. doi: 10.1186/s13148-019-0729-7 (PMC6721173; doi:10.1186/s13148-019-0729-7)
Supplement: Supplementary file 5 — Gene expression level of candidate genes in blood of non-twin subjects with Alzheimer’s disease in comparison to reference subjects. Gene expression levels of the candidate genes from Additional file 2c in GEO NCBI data from blood (GSE63061) of non-twin subjects with Alzheimer’s disease in comparison to reference subjects. (XLSX 12 kb) [file 13148_2019_729_MOESM5_ESM.xlsx]

## Sheet: GSE63061_blood
Additional file 4. Gene expression differences for the closest genes from Table EV1 (GSE63061, GEO, NCBI) in blood.
			Control vs mild cognitive impairment							Control vs Alzheimer's disease
Illumina Human HT12v4.0 ID	Gene symbol	Gene title	p-value	adj. p-value	t	B	log2FC	FC		p-value	adj. p-value	t	B	log2FC	FC
ILMN_1749493	ADARB2	adenosine deaminase, RNA specific B2 (inactive)	0.589	0.861013	0.540702	-6.96119	0.00398	1.00276		0.0766	0.346	-1.77852	-5.63658	-0.013	1.00905
ILMN_1767541	ARAP2	ArfGAP with RhoGAP domain, ankyrin repeat and PH domain 2	0.267	0.647101	1.11327	-6.49027	0.0228	1.01593		0.238	0.609	-1.18301	-6.509	-0.0226	1.01579
ILMN_3244434	ARAP2	ArfGAP with RhoGAP domain, ankyrin repeat and PH domain 2	0.573	0.853306	-0.56507	-6.94776	-0.0111	1.00772		0.994	0.999	-0.0070026	-7.2058	-0.000129	1.00009
ILMN_2342851	ARHGAP8	Rho GTPase activating protein 8	0.987	0.996777	0.0167294	-7.10686	6.6e-05	1.00005		0.388	0.741	-0.864702	-6.83303	-0.00309	1.00214
ILMN_2352190	CLIP2	CAP-Gly domain containing linker protein 2	0.045	0.279468	2.01737	-5.09559	0.0387	1.02719		0.158	0.505	-1.41596	-6.20879	-0.0241	1.01685
ILMN_1811682	CLIP2	CAP-Gly domain containing linker protein 2	0.217	0.596593	1.23769	-6.34526	0.0195	1.01361		0.102	0.407	-1.64052	-5.86936	-0.0253	1.01769
ILMN_3246547	CNPY1	canopy FGF signaling regulator 1	0.159	0.522858	-1.41277	-6.11562	-0.00898	1.00624		0.0573	0.292	1.90998	-5.39783	0.0103	1.00716
ILMN_1658902	DEAF1	DEAF1, transcription factor	0.0932	0.404757	-1.68666	-5.69687	-0.0234	1.01635		0.47	0.798	0.724143	-6.94426	0.00937	1.00652
ILMN_1704045	DEAF1	DEAF1, transcription factor	0.625	0.874688	0.489204	-6.98763	0.00326	1.00226		0.297	0.669	-1.0452	-6.66155	-0.00636	1.00442
ILMN_1708296	DEAF1	DEAF1, transcription factor	0.717	0.913991	-0.36291	-7.04129	-0.00363	1.00252		0.74	0.92	-0.332011	-7.15079	-0.00302	1.0021
ILMN_2387784	DEAF1	DEAF1, transcription factor	0.3	0.67949	-1.03889	-6.56972	-0.00787	1.00547		0.823	0.949	0.22353	-7.18088	0.00166	1.00115
ILMN_2193213	DEFA1	defensin alpha 1	0.0938	0.406726	1.6833	-5.70243	0.259	1.19665		0.785	0.937	-0.273422	-7.1685	-0.0383	1.0269
ILMN_2356574	GTF3C2	general transcription factor IIIC subunit 2	0.0108	0.13511	2.57324	-3.85429	0.0558	1.03944		0.0118	0.109	-2.53575	-4.03703	-0.0511	1.03605
ILMN_1746457	GTF3C2	general transcription factor IIIC subunit 2	0.0388	0.25957	2.07997	-4.97015	0.048	1.03383		0.00648	0.0728	-2.74637	-3.49714	-0.0541	1.03821
ILMN_1880012	SEMA5A	semaphorin 5A	0.882	0.967836	-0.148287	-7.09603	-0.000812	1.00056		0.832	0.95	-0.212187	-7.18335	-0.00108	1.00075
